# Supplementary material for: Homochiral vs. heterochiral preference in chiral self-recognition of cyclic diols
Source: Royal Society of Chemistry journal article supplement (doi:10.1039/d4cp00351a), 2024-01-01
Supplement: d4cp00351a2.pdf [file d4cp00351a2.pdf]

Interactive 3D structure renders for:

# Homochiral *vs.* heterochiral preference in chiral self-recognition of cyclic diols

Jennifer Dupont,<sup>a)</sup> Beppo Hartwig,<sup>b)</sup> Katia Le Barbu-Debus,<sup>a)</sup> Valéria Lepère,<sup>a)</sup> Régis Guillot,<sup>c)</sup> Martin A. Suhm,<sup>b)</sup> Anne Zehnacker<sup>a)\*</sup>

*a)* Institut des Sciences Moléculaires d'Orsay (ISMO), CNRS, rue André Rivière, Université Paris-Saclay, F-91405 Orsay, France.

*b)* Institut für Physikalische Chemie, Georg-August-Universität Göttingen, Tammannstr. 6, 37077 Göttingen, Germany.

*c)* Institut de Chimie Moléculaire et des Matériaux d'Orsay (ICMMO), 17 Av. des Sciences Université Paris-Saclay, F-91405 Orsay, France.

E-mail: [anne.zehnacker-rentien@universite-paris-saclay.fr](mailto:anne.zehnacker-rentien@universite-paris-saclay.fr)\*

## Contents

|          |                      |           |
|----------|----------------------|-----------|
| <b>1</b> | <b>How to use</b>    | <b>1</b>  |
| <b>2</b> | <b>Homo dimers</b>   | <b>1</b>  |
| <b>3</b> | <b>Hetero dimers</b> | <b>8</b>  |
|          | <b>Literature</b>    | <b>16</b> |

## 1 How to use

The interactive 3d structures of the 1-phenyl-*cis*-1,2-cyclohexanediol dimers can be enabled by clicking on them. Flash player is required. Online PDF viewers are often not capable of displaying the structures. If problems arise with other PDF viewers Adobe Acrobat always worked in our testing. By holding left click the render can be rotated, while the mouse-wheel can be used to zoom in and out (holding right click has the same effect). Holding the control key allows to move the structure within the render box. In the static images intermolecular OH $\cdots$ O hydrogen bonds are highlighted by blue dotted lines and intramolecular ones by red dotted lines. Similar images of the most stable dimers of *trans*-cyclohexane-1,2-diol are available in the ESI of Ref. [1].

## 2 Homo dimers

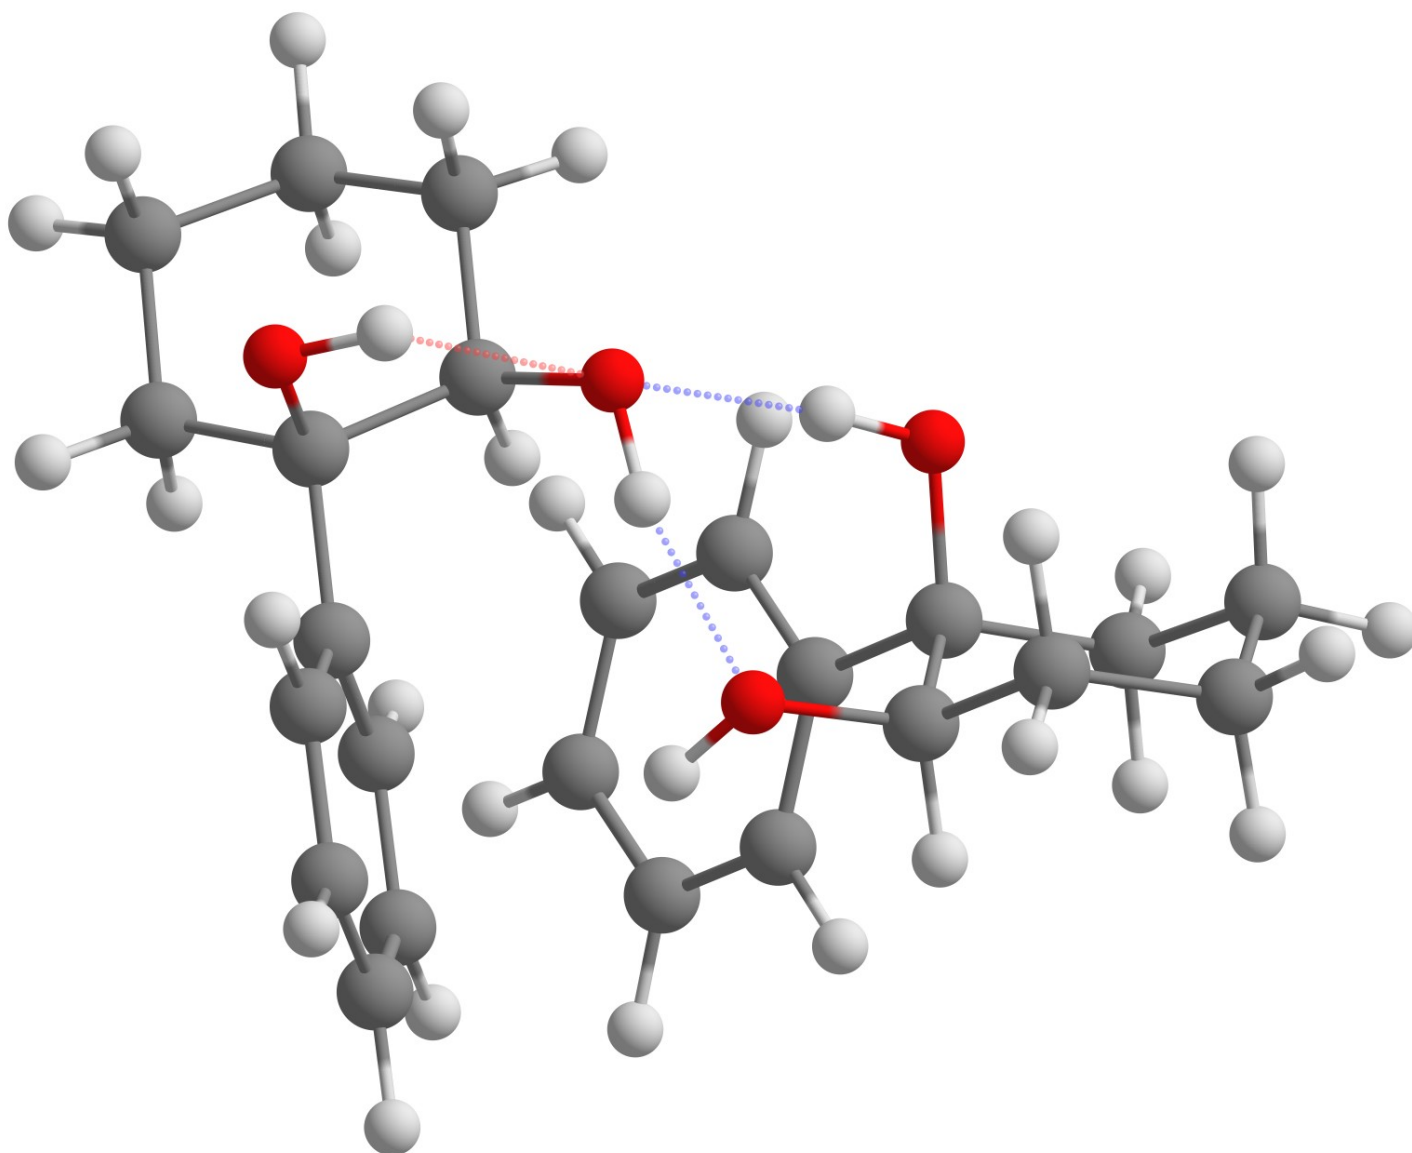

Fig. S1: Interactive 3d representation of the Insertion  $M_1+M_1$  homo-dimer.

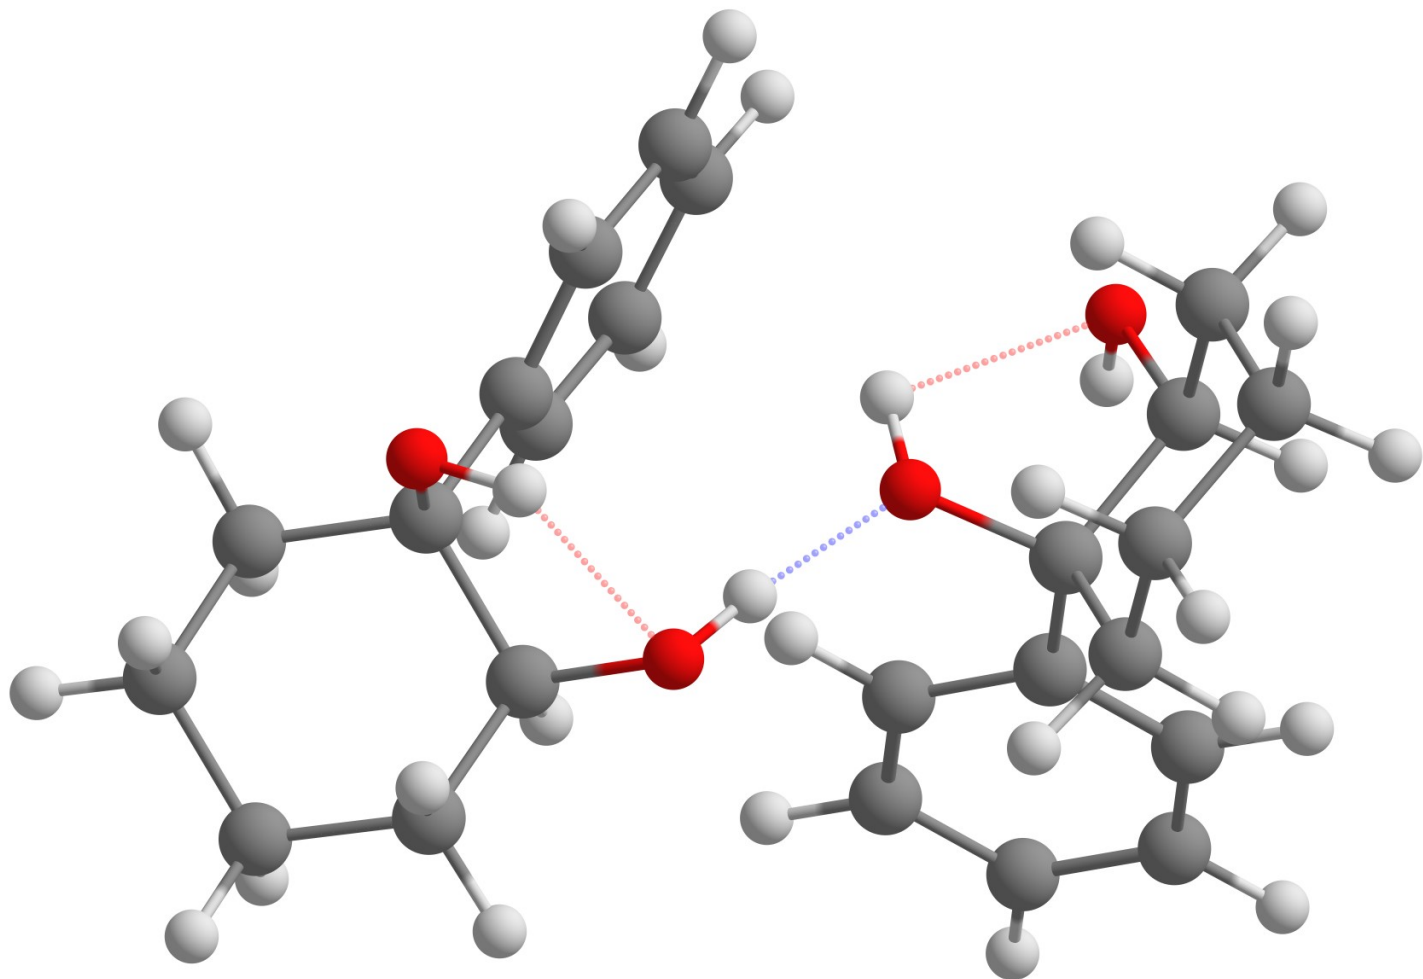

Fig. S2: Interactive 3d representation of the Addition  $O_2H_2 \rightarrow O_1(M_1+M_1)$  homo-dimer.

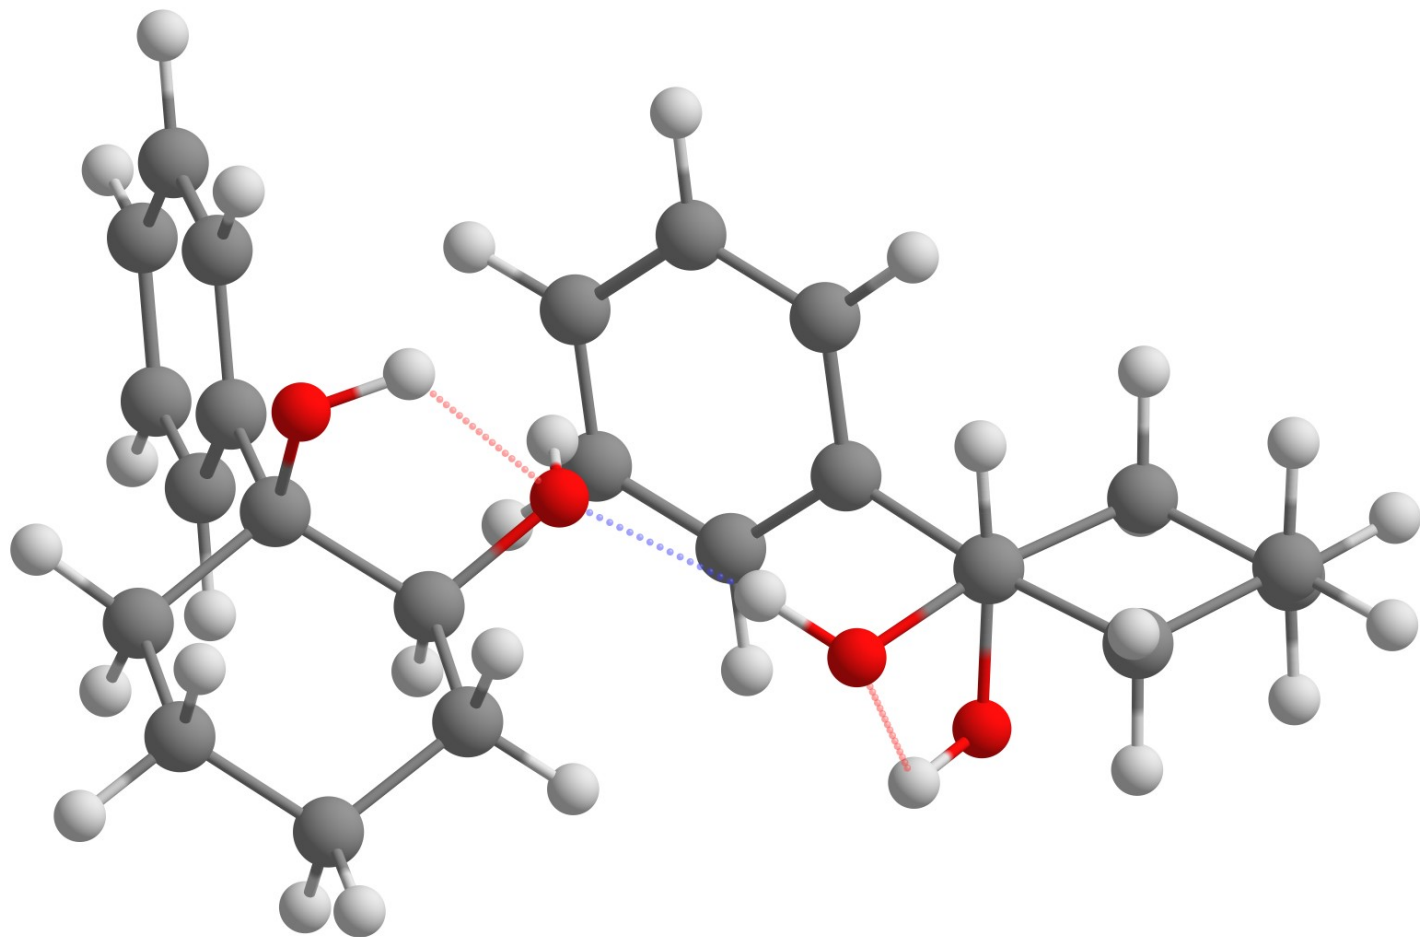

Fig. S3: Interactive 3d representation of the Addition  $\text{O}_2\text{H}_2 \rightarrow \text{O}_2(\text{M}_1+\text{M}_1)$  homo-dimer.

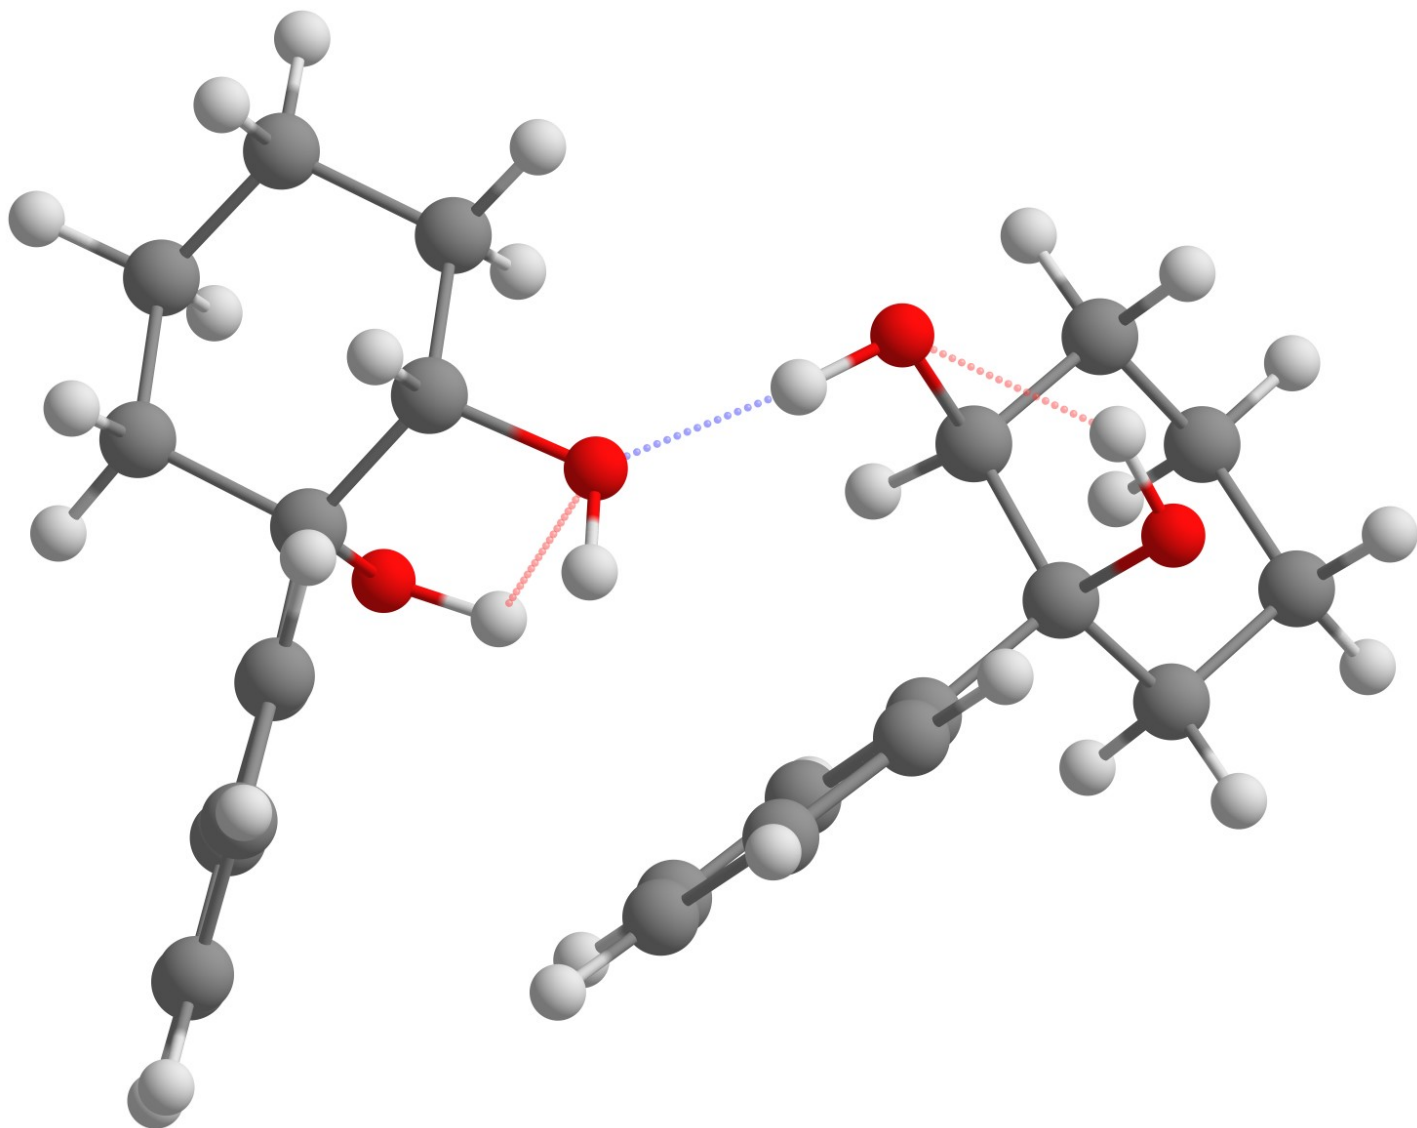

Fig. S4: Interactive 3d representation of the Addition  $O_2H_2 \rightarrow O_2(M_1+M_1)$  a homo-dimer.

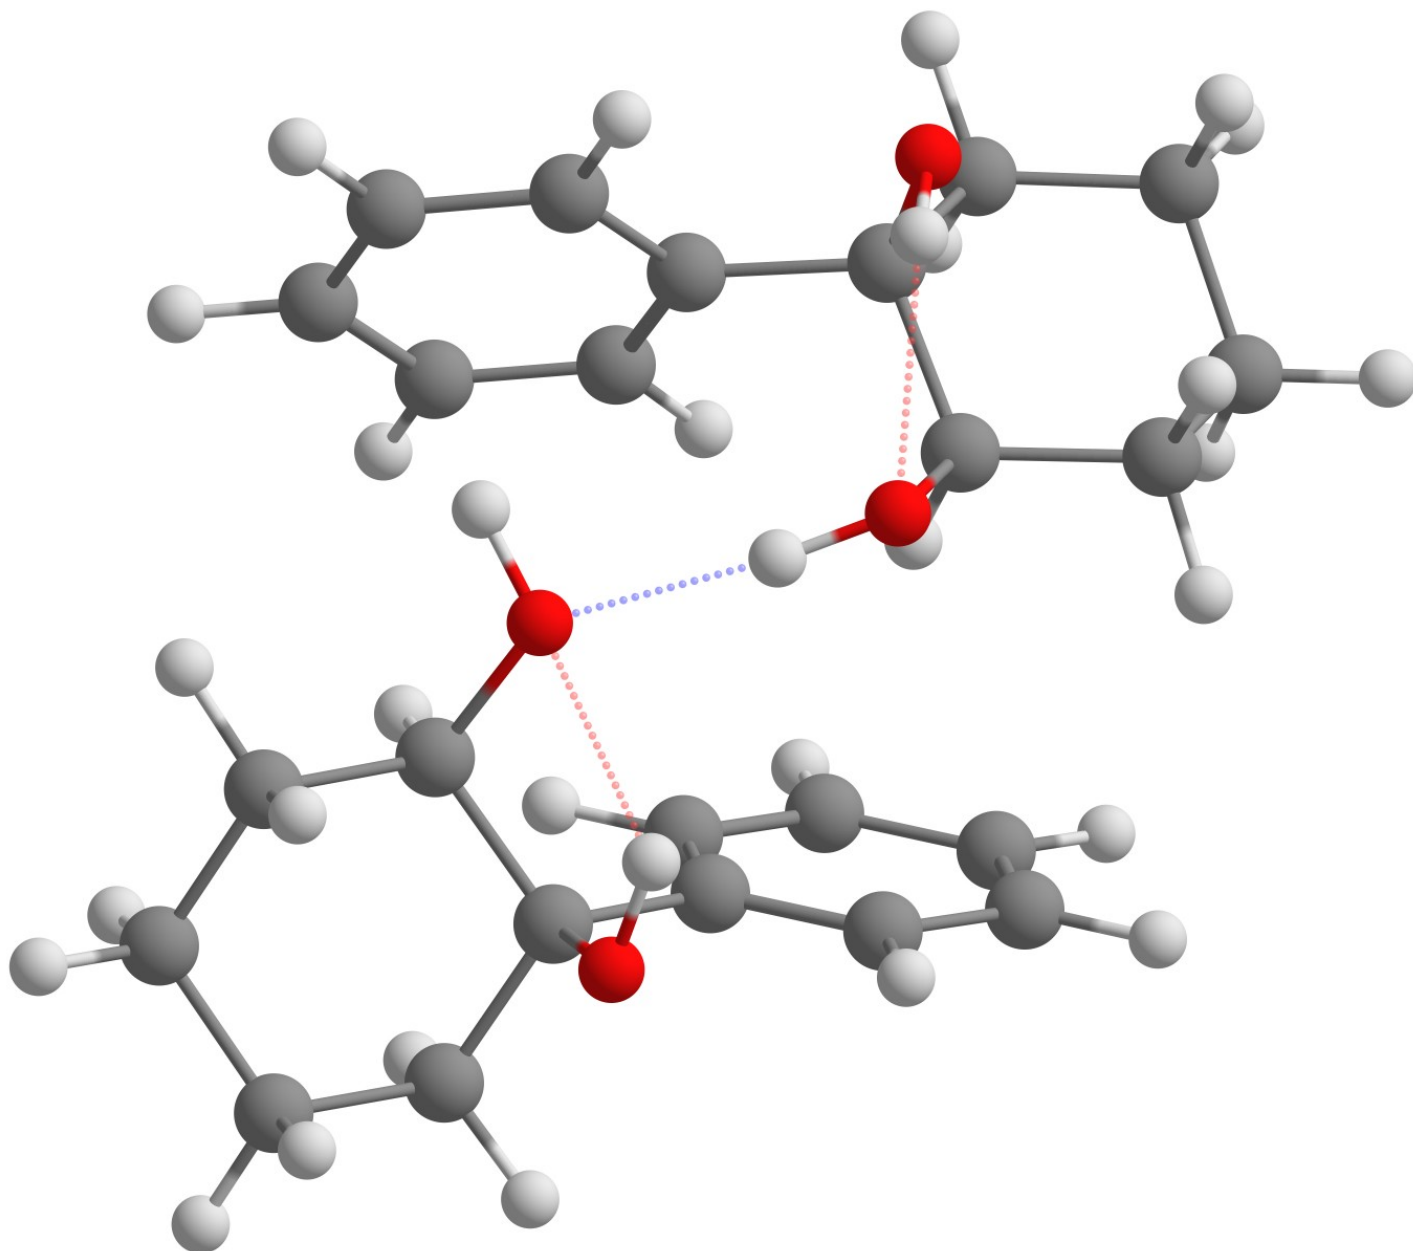

Fig. S5: Interactive 3d representation of the Addition  $\text{O}_2\text{H}_2 \rightarrow \text{O}_2(\text{M}_1+\text{M}'_1)$  homo-dimer.

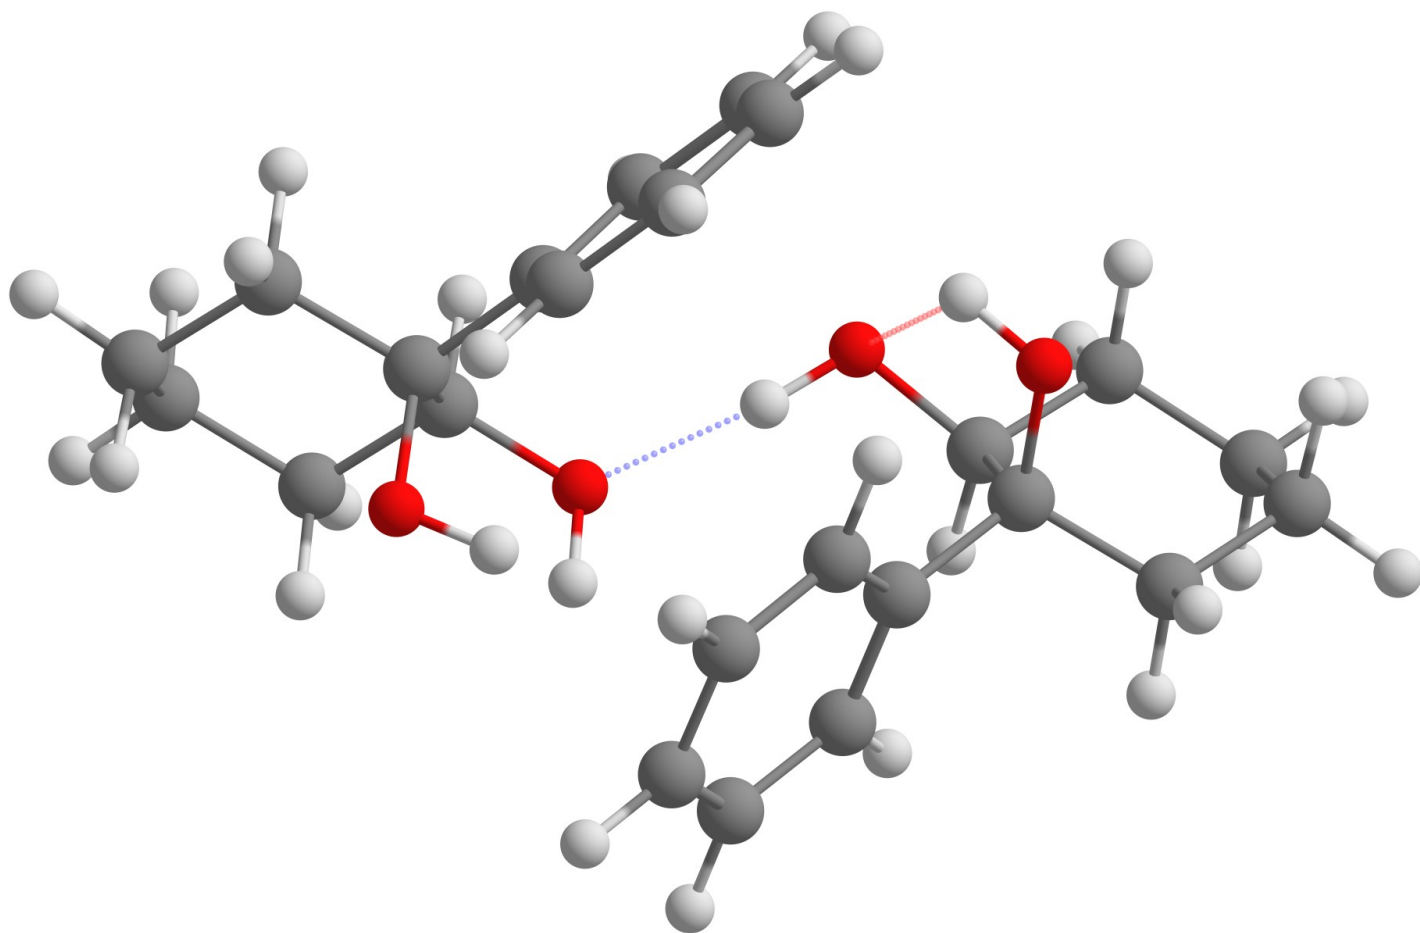

Fig. S6: Interactive 3d representation of the Addition  $\text{O}_2\text{H}_2 \rightarrow \text{O}_2(\text{M}_1+\text{M}_2)$  homo-dimer.

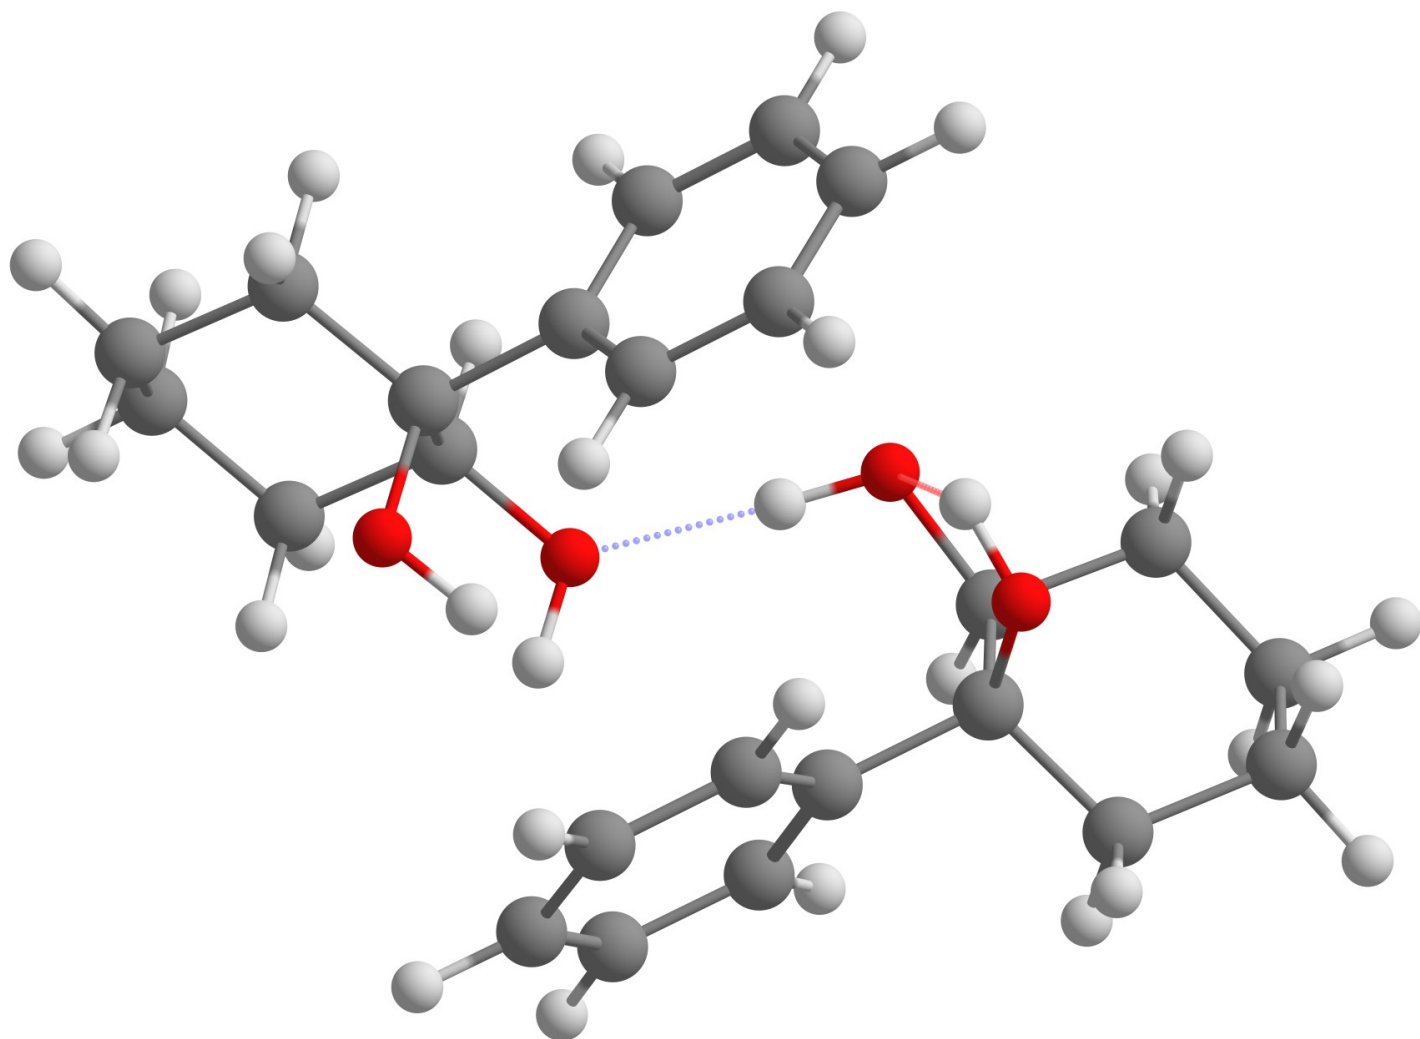

Fig. S7: Interactive 3d representation of the Addition  $\text{O}_2\text{H}_2 \rightarrow \text{O}_2(\text{M}_1+\text{M}_2)$  a homo-dimer.



### 3 Hetero dimers

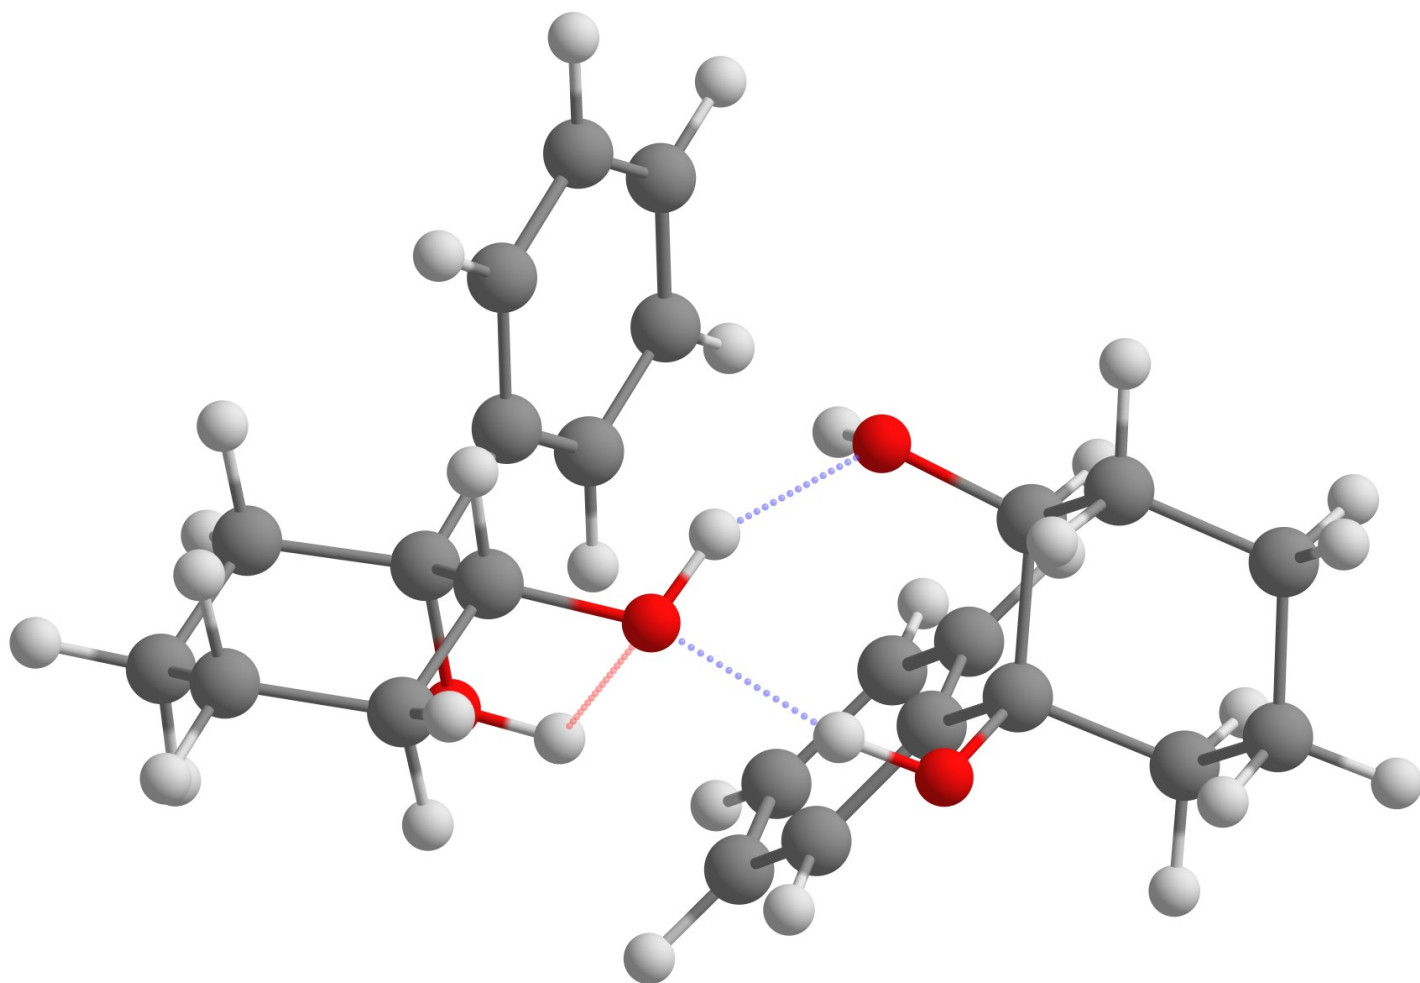

Fig. S8: Interactive 3d representation of the Insertion  $M_1+M_1$  hetero-dimer.

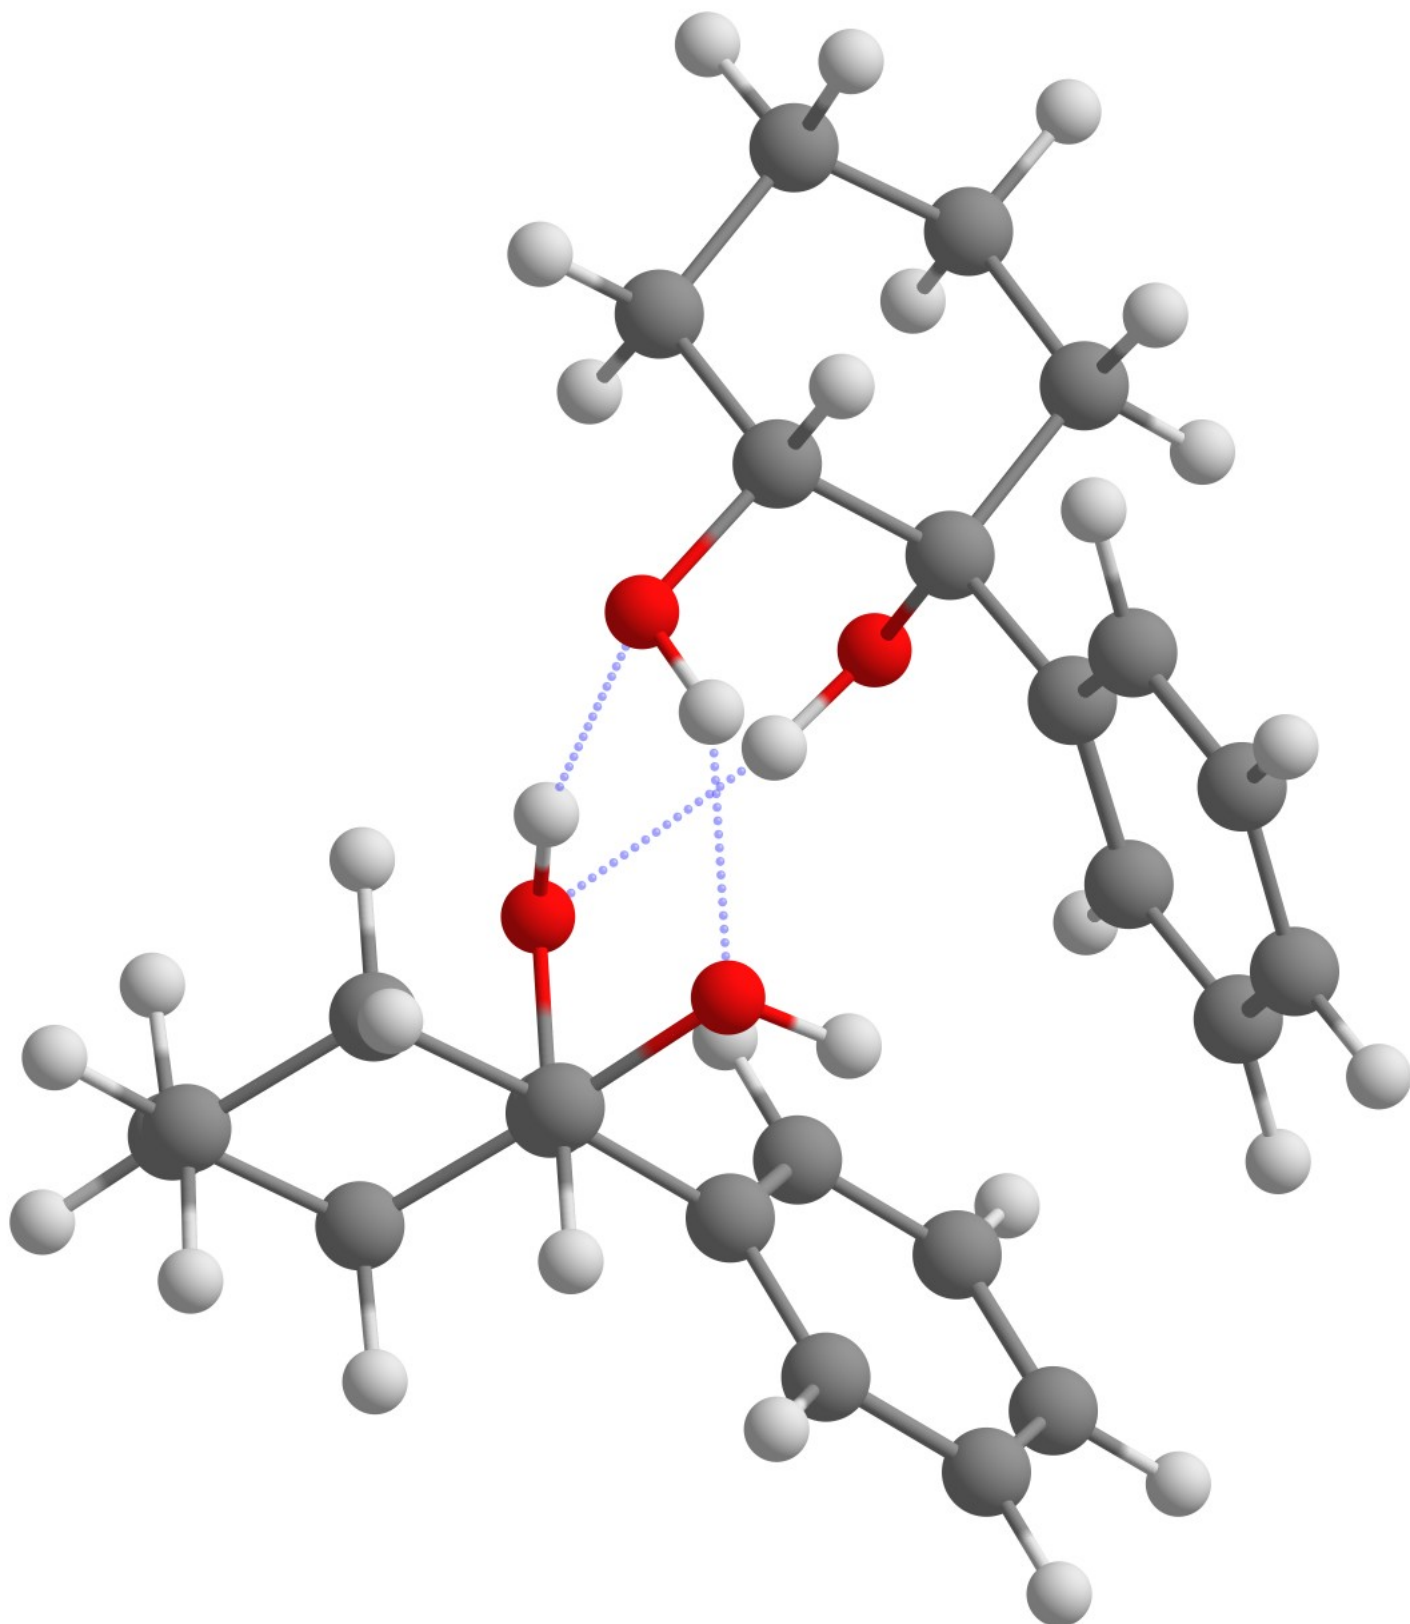

Fig. S9: Interactive 3d representation of the Double insertion hetero-dimer.

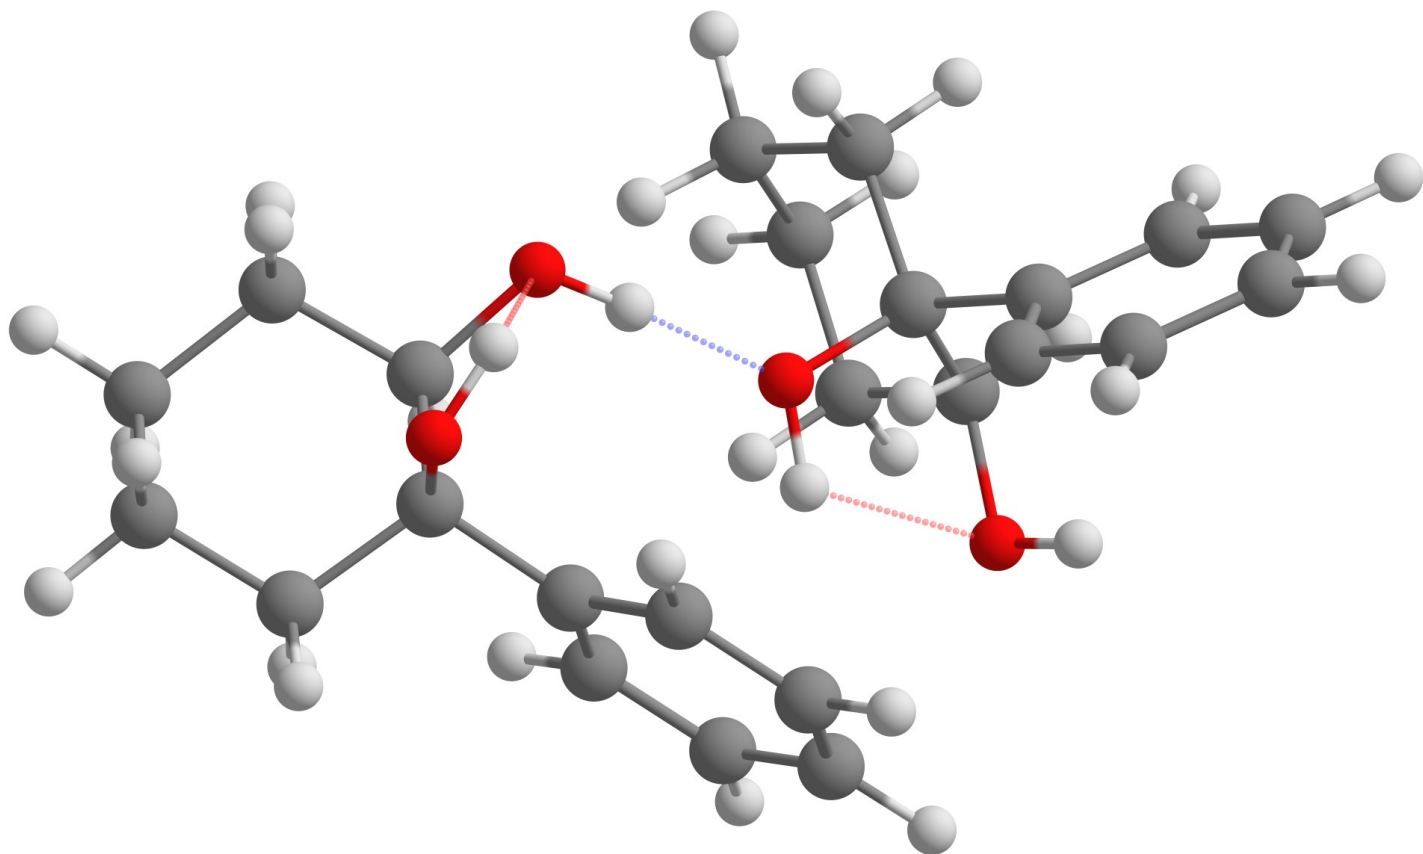

Fig. S10: Interactive 3d representation of the Addition  $\text{O}_2\text{H}_2 \rightarrow \text{O}_1(\text{M}_1+\text{M}_1)$  hetero-dimer.

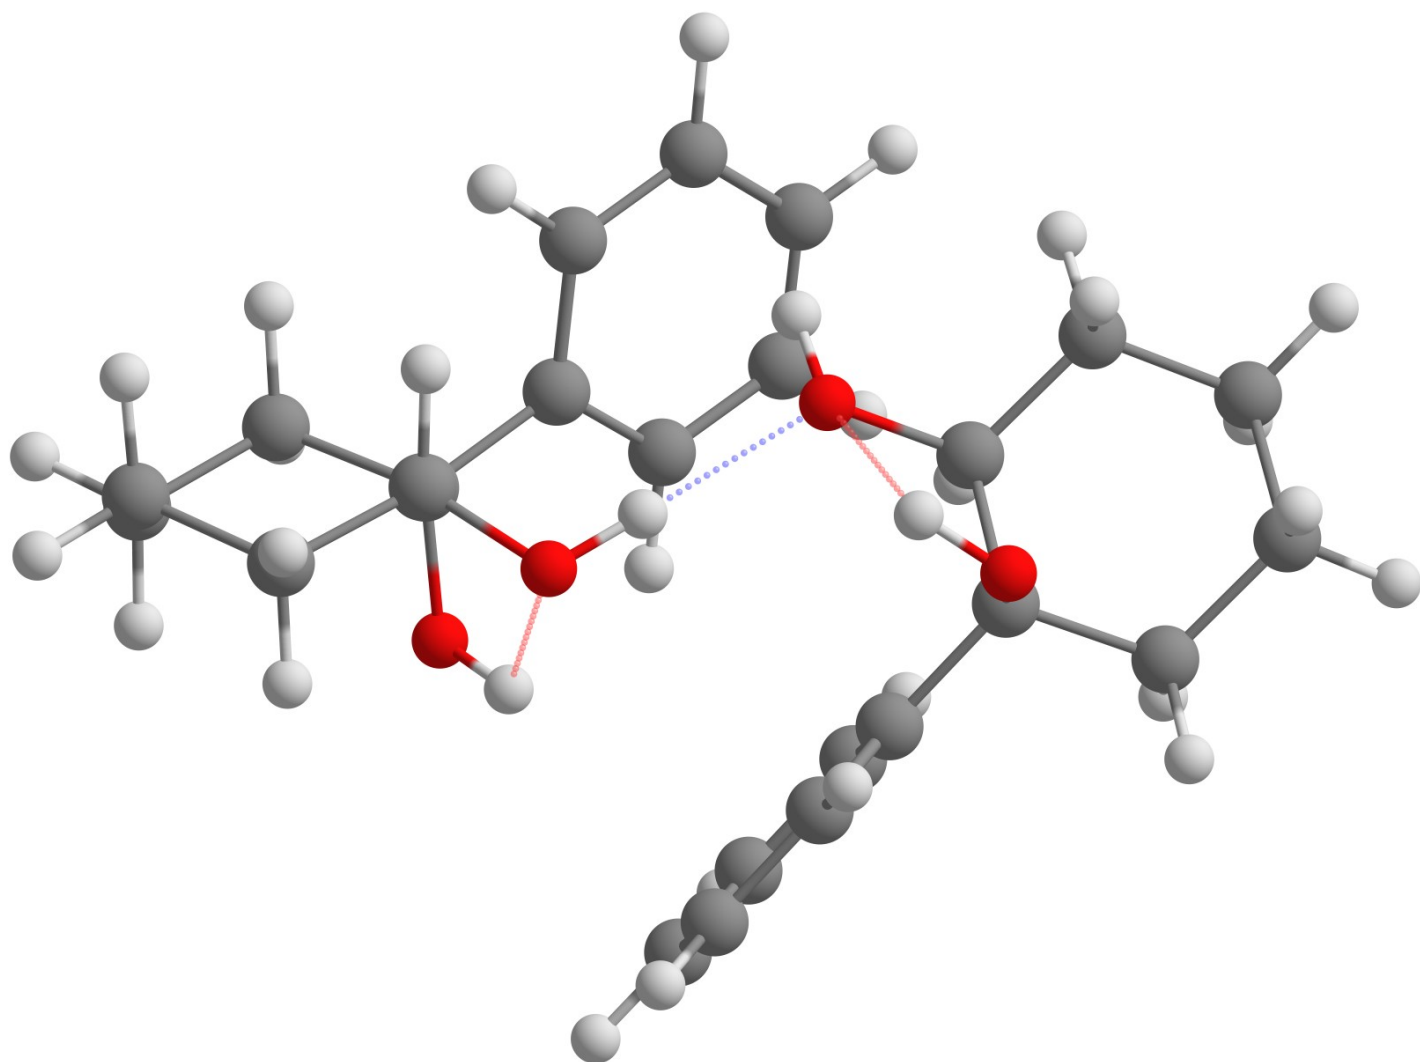

Fig. S11: Interactive 3d representation of the Addition  $\text{O}_2\text{H}_2 \rightarrow \text{O}_2(\text{M}_1+\text{M}'_1)$  hetero-dimer.

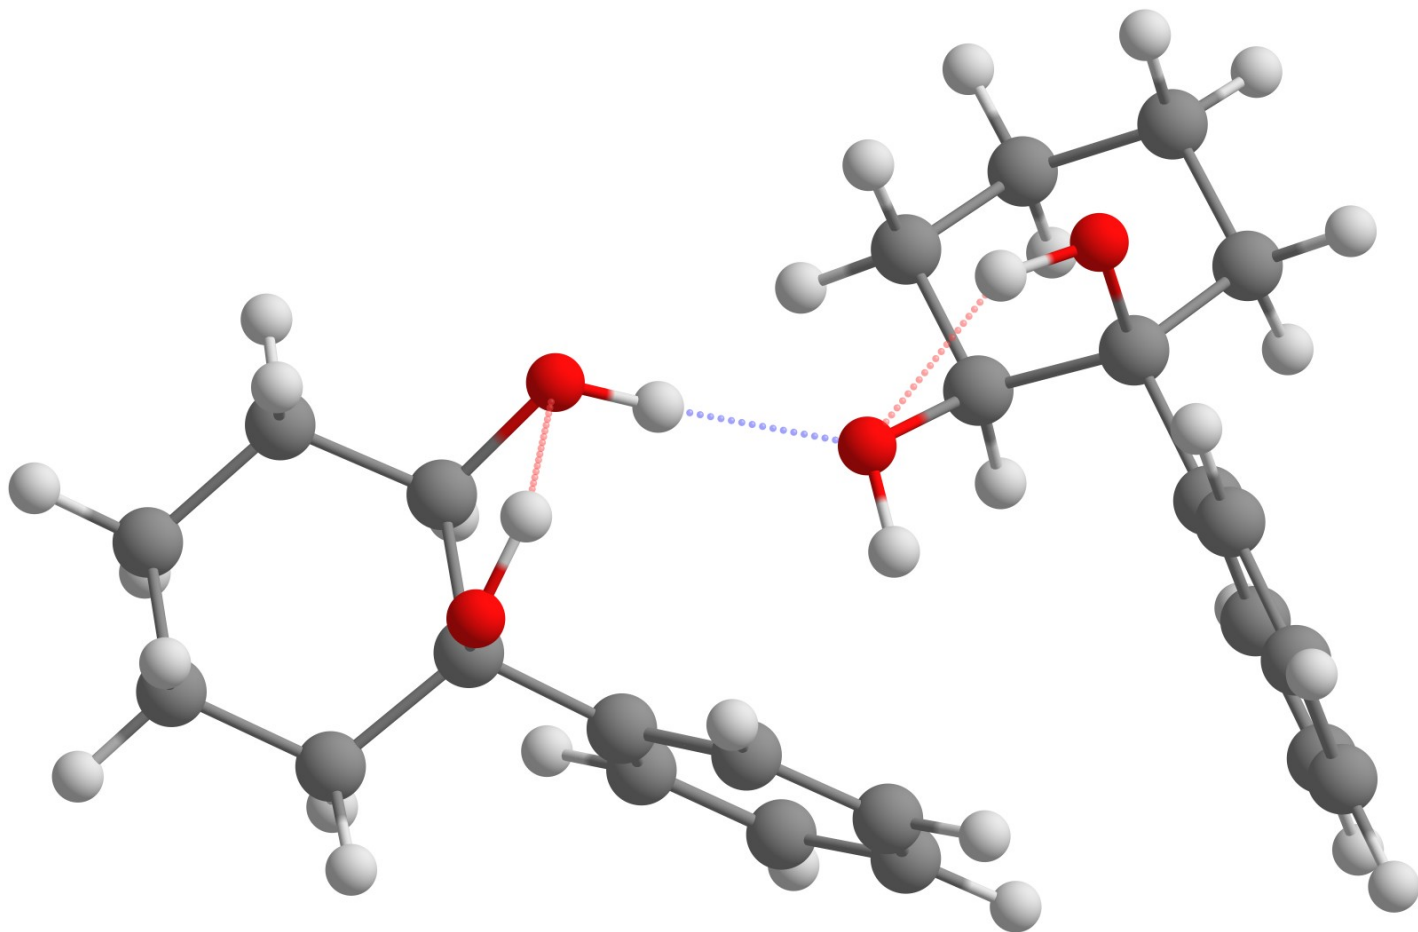

Fig. S12: Interactive 3d representation of the Addition  $O_2H_2 \rightarrow O_2(M_1+M_1)$  a hetero-dimer.

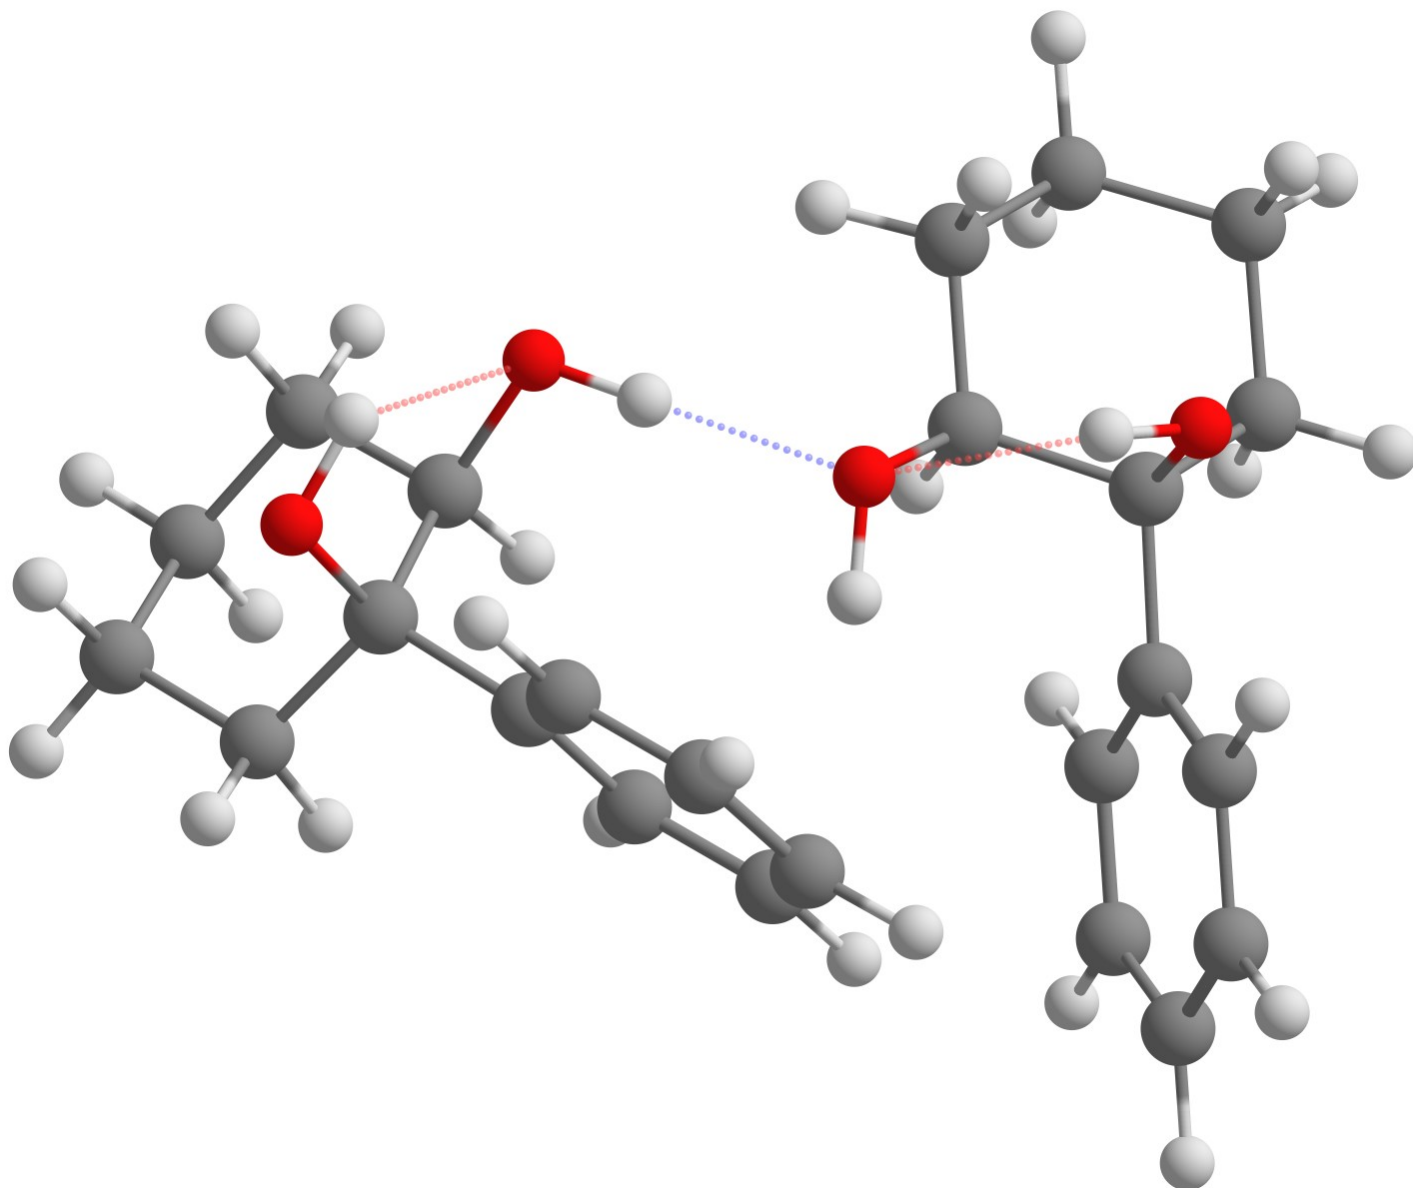

Fig. S13: Interactive 3d representation of the Addition  $O_2H_2 \rightarrow O_2(M_1+M_1)b$  hetero-dimer.

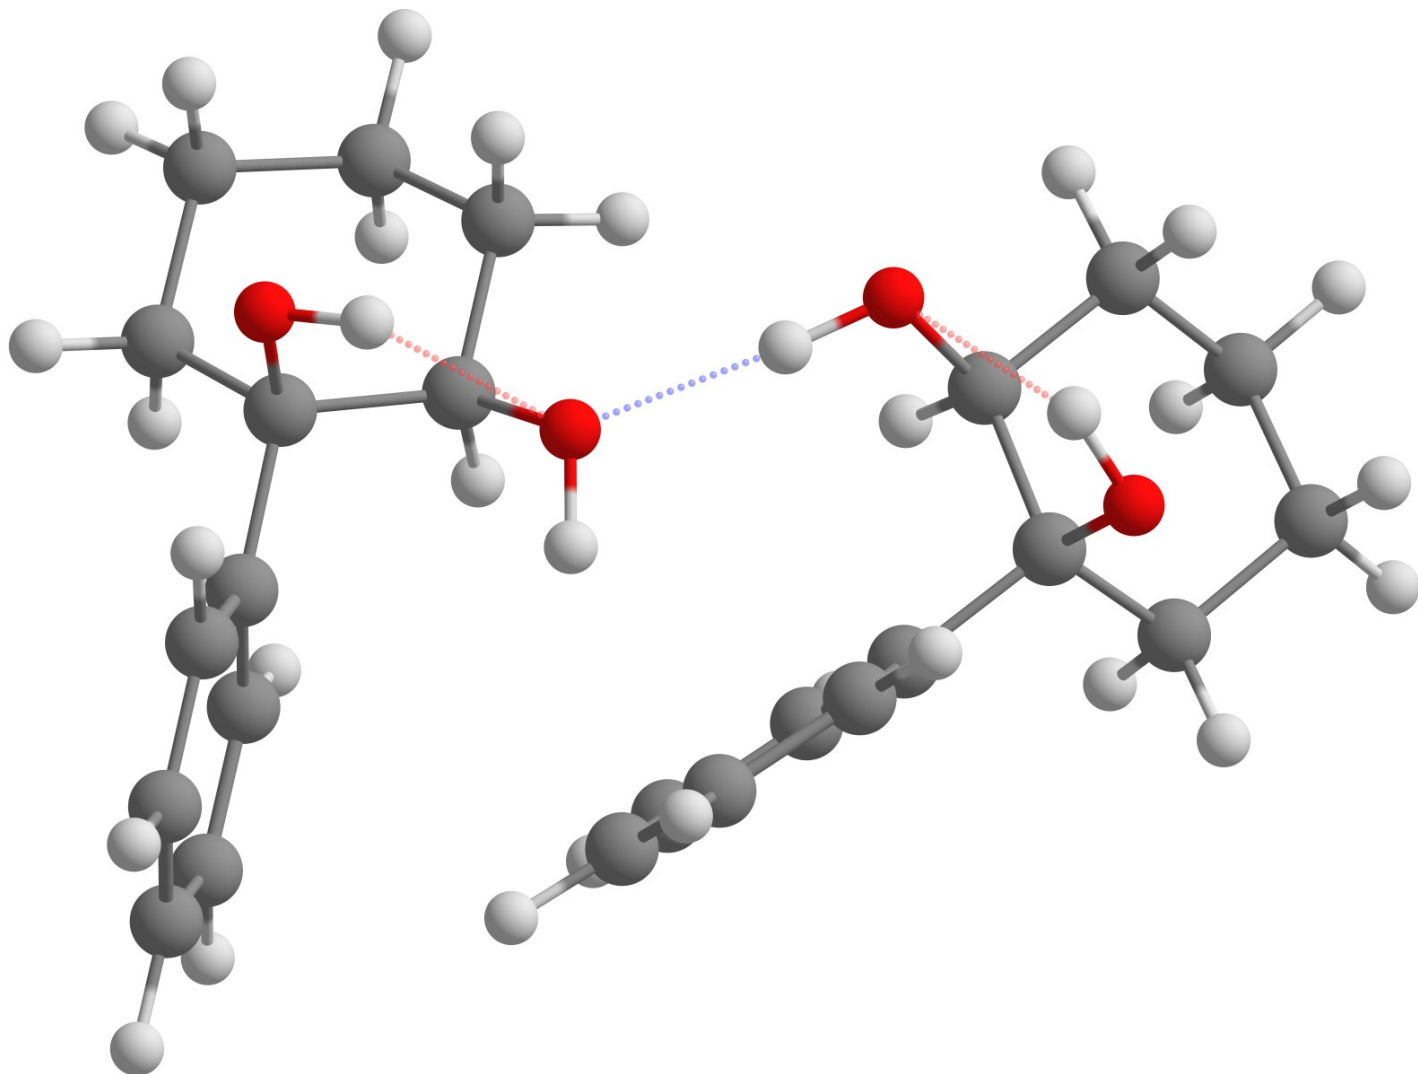

Fig. S14: Interactive 3d representation of the Addition  $O_2H_2 \rightarrow O_2(M_1+M_1)c$  hetero-dimer.

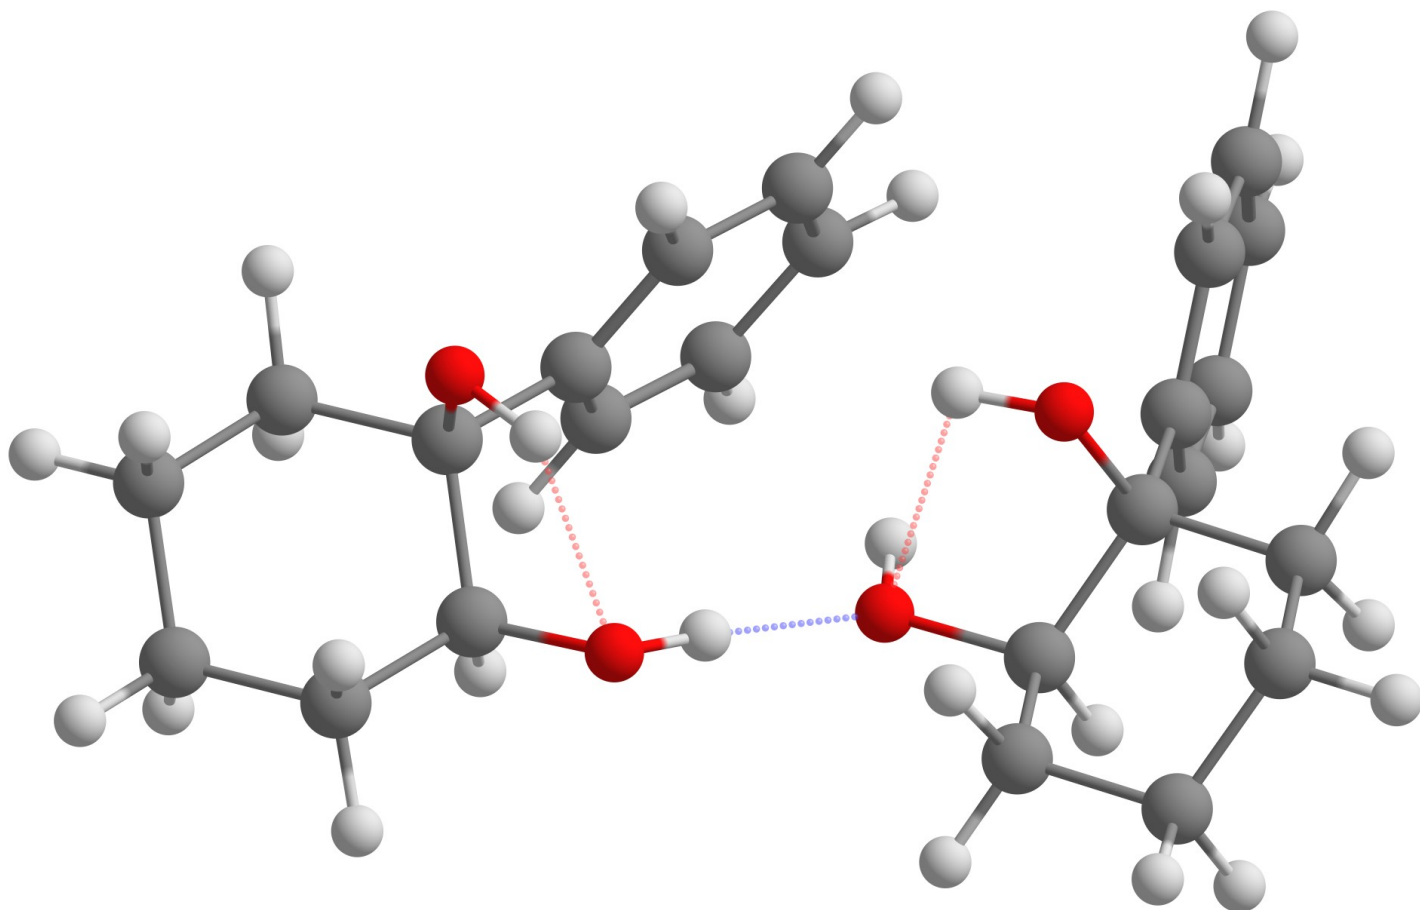

Fig. S15: Interactive 3d representation of the Addition  $\text{O}_2\text{H}_2 \rightarrow \text{O}_2(\text{M}_1+\text{M}_1)\text{d}$  hetero-dimer.



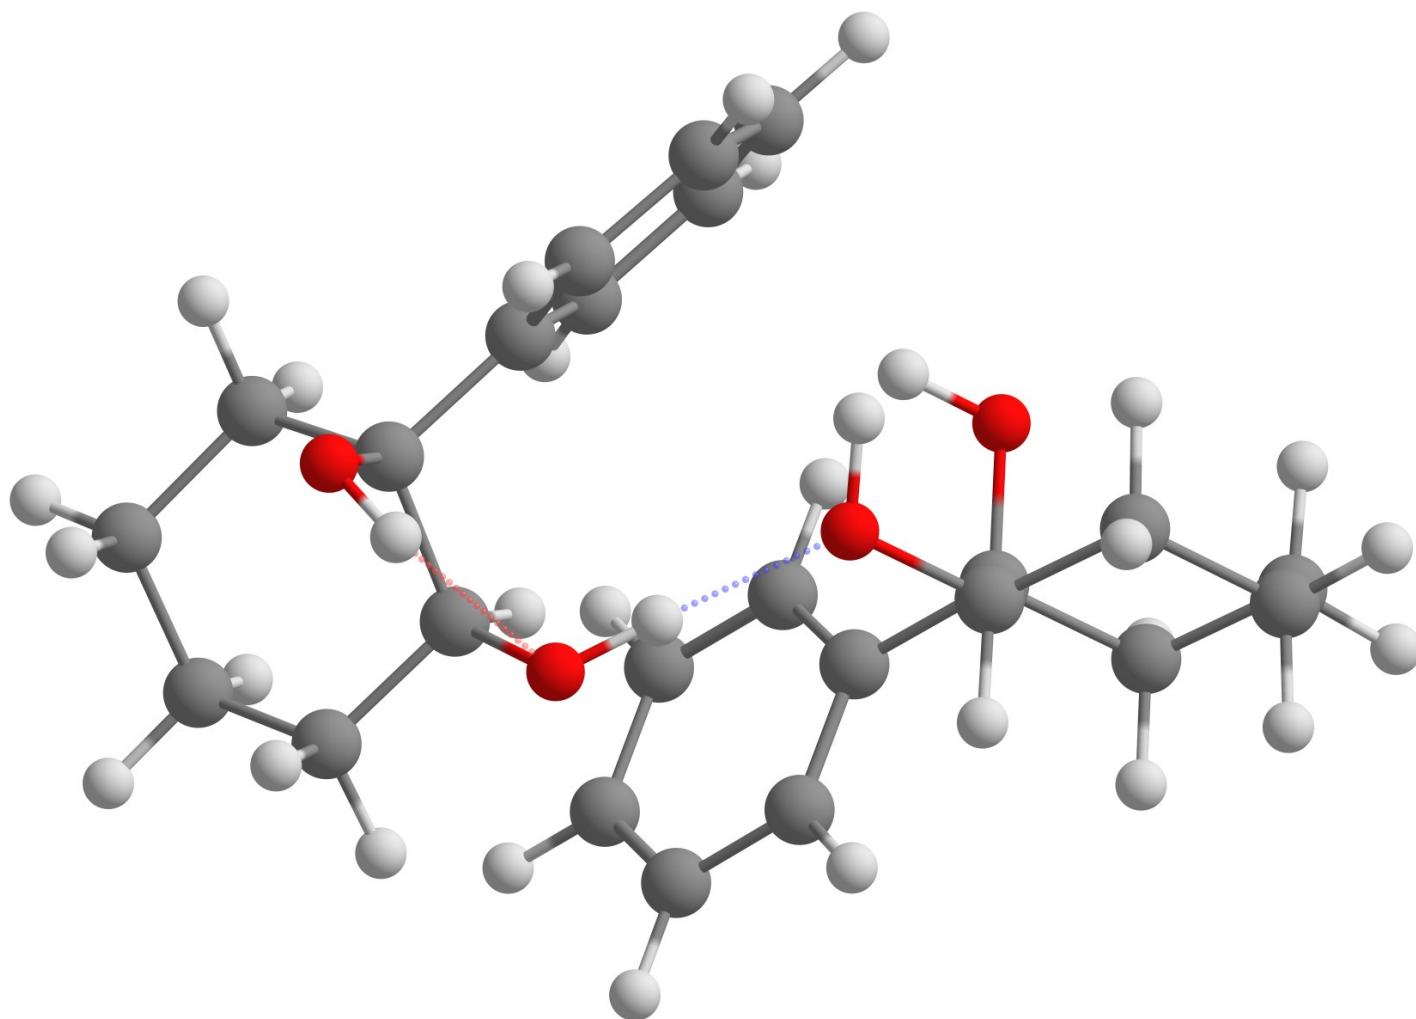

Fig. S16: Interactive 3d representation of the Addition  $\text{O}_2\text{H}_2 \rightarrow \text{O}_2(\text{M}_1+\text{M}_2)$  hetero-dimer.

## Literature

- [1] B. Hartwig, M. Lange, A. Poblitzki, R. Medel, A. Zehnacker, M. A. Suhm, “The reduced cohesion of homo-configurational 1,2-diols”, *Phys. Chem. Chem. Phys.* **2020**, *22*, 1122–1136.
